# Supplementary material for: Using snowflake surface-area-to-volume ratio to model and interpret snowfall triple-frequency radar signatures
Source: Copernicus journal article supplement (doi:10.5194/acp-17-12011-2017), 2017-10-10
Supplement: Supplementary file 1 [file acp-17-12011-2017-supplement.zip]

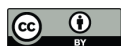

## *Supplement of*

# **Using snowflake surface-area-to-volume ratio to model and interpret snowfall triple-frequency radar signatures**

**Mathias Gergely et al.**

*Correspondence to:* Mathias Gergely ([mathias.gergely@utah.edu](mailto:mathias.gergely@utah.edu))

- [acp-17-12011-2017-supplement-title-page.pdf](#)
- [Supplement\\_snow\\_SAV](#)
  - [Supplement\\_snow\\_SAV.pdf](#)
  - [ice\\_sphere\\_collection\\_results](#)
    - \* [DWR](#)
    - \* [README.txt](#)
    - \* [sigmab](#)

The copyright of individual parts of the supplement might differ from the CC BY 3.0 License.
